# Supplementary material for: Synthesis of a crystalline zeolitic imidazole framework-8 nano-coating on single environment-sensitive viral particles for enhanced immune responses
Source: Royal Society of Chemistry journal article supplement (doi:10.1039/d2na00767c), 2023-01-01
Supplement: d2na00767c2.pdf [file d2na00767c2.pdf]

## Supplementary information-2

Synthesis of crystalline zeolitic imidazole framework-8 nano-coating on single environment-sensitive viral particle for enhanced immune responses

Liuyang Wang,<sup>‡a,b</sup> Xuan Lin,<sup>‡b</sup> Yanan Sheng,<sup>b</sup> Hongyu Zhu,<sup>b,c</sup> Zhengjun Li,<sup>b</sup> Zhiguo Su,<sup>b</sup> Rong Yu,<sup>a\*</sup> Songping Zhang<sup>b\*</sup>

\* Corresponding authors

<sup>a</sup> Key Laboratory of Drug-Targeting and Drug Delivery System of the Ministry of Education, West China School of Pharmacy, Sichuan University, Chengdu, 610041, China

<sup>b</sup> State Key Laboratory of Biochemical Engineering, Institute of Process Engineering, Chinese Academy of Sciences, Beijing 100190, China

<sup>c</sup> Division of Molecular Science, Graduate School of Science and Technology, Gunma University, Kiryu, 376-8515, Japan.

\*Corresponding authors:

Rong Yu, E-mail: yurong@scu.edu.cn

Songping Zhang, Tel (Fax): +86-10-82544958, E-mail: spzhang@ipe.ac.cn

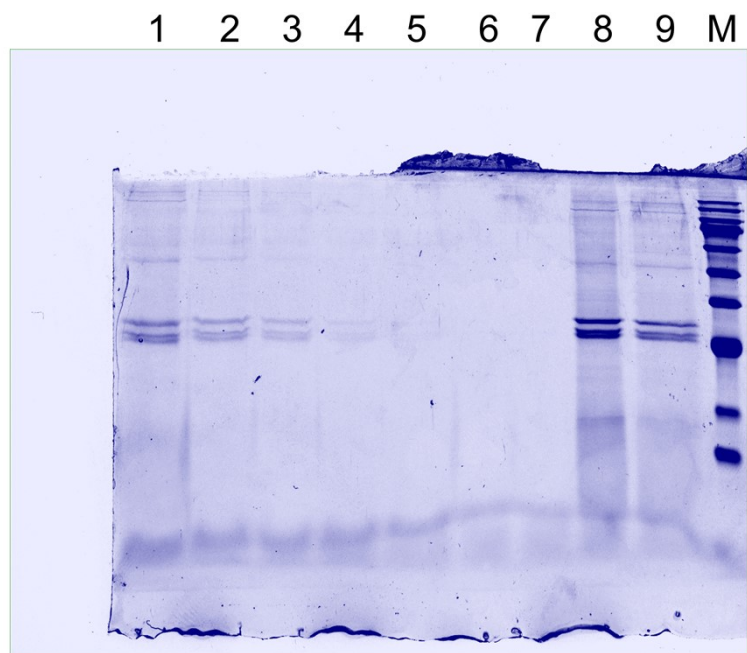

**Figure. S1** Underlying raw SDS-PAGE image of **Figure. 2b** in result. Lanes 1-5: reaction supernatant of 2, 4, 6, 8, and 10 hours; lanes 6 and 7: washing supernatant; lane 8: suspension of synthesized 146S@ZIF-8; lane 9 and M: 146S reference and Marker.

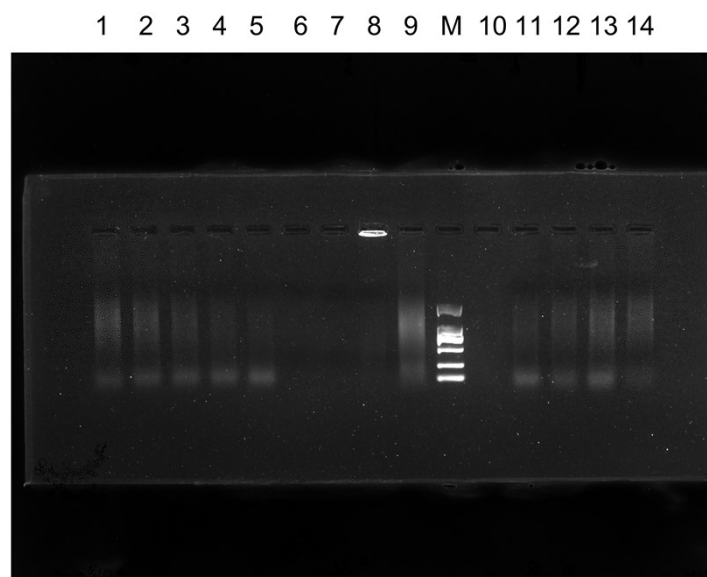

**Figure. S2** Underlying raw agarose gel electrophoresis image of **Figure. 2b** in result. Lanes 1-5: reaction supernatant of 2, 4, 6, 8, and 10 hours; lanes 6 and 7: washing supernatant; lane 8: suspension of synthesized 146S@ZIF-8; lane 9 and M: 146S reference and Marker; lane 10-14 were not related to this manuscript.

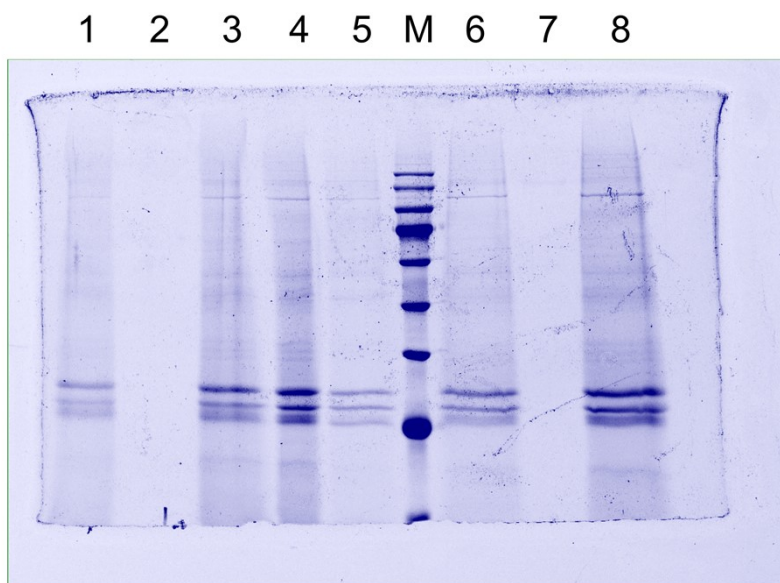

**Figure. S3** Underlying raw SDS-PAGE image of **Figure. 3b** in result. Lane 1: the lysate mixture of the 146S@ZIF-8; Lane 2: the supernatant of the lysate mixture; Lane 3: the insoluble substances after EDTA treatment that re-suspended into PSB with half volume of the lysate solution; Lane 4 and M: 146S reference and marker; lane 5-8 were not related to this manuscript.
